# Supplementary material
Source: Springer Nature journal article supplement (https://www.springermedizin.de/resource/supplementary/12968_2013_3359_MOESM4_ESM.pdf/9583500)

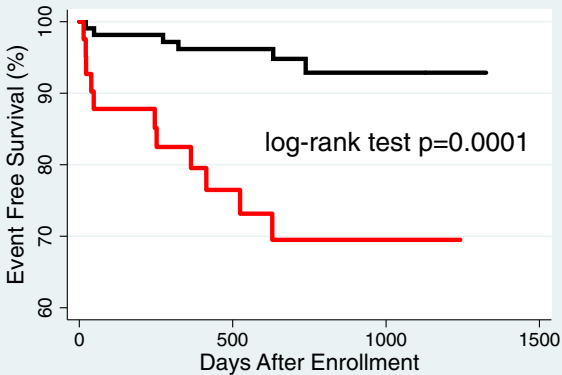

|                      | 0   | 500 | 1000 | 1500 |
|----------------------|-----|-----|------|------|
| No Resting CMR Abnl. | 108 | 85  | 16   | 0    |
| Resting CMR Abnl.    | 41  | 23  | 5    | 0    |

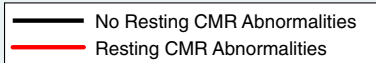

Supplement: MOESM4 [file 9583500]
